# Supplementary material
Source: Research Square preprint supplement (doi:10.21203/rs.3.rs-8909517/v1)
Supplement: Supplementary file 1 [file c86de96f5622e45036a85978.docx]

**Impact of silicon-rich rice husk biochar on nitrogen use efficiency in nitrogen-deficient soils with contrasting pH**

Sudarshan Varma1 and Nagabovanalli Basavarajappa Prakash1*

1*Plant Nutrition Laboratory, Department of Soil Science and Agriculture Chemistry, University of Agricultural Sciences, GKVK, Bengaluru, Karnataka, India.*

*Corresponding author: [nagabovanalliprakash@rediffmail.com](mailto:nagabovanalliprakash@rediffmail.com)

| **RHB  (t ha-1)** | **Acidic soil** | | | | **Neutral soil** | | | | **Alkaline soil** | | | |
| --- | --- | --- | --- | --- | --- | --- | --- | --- | --- | --- | --- | --- |
| **Without N** | **Urea** | **KNO3** | **NH4Cl** | **Without N** | **Urea** | **KNO3** | **NH4Cl** | **Without N** | **Urea** | **KNO3** | **NH4Cl** |
| **Plant height (cm)** | | | | | | | | | | | | |
| 0 | 43.08 ± 3.23e | 49.20 ± 3.32abcde | 49.20 ± 1.90abcde | 46.55 ± 1.97de | 60.70 ± 0.56bcd | 61.70 ± 2.65bcd | 63.00 ± 1.04bc | 60.07 ± 1.28cd | 41.53 ± 2.48e | 53.00 ± 1.44abcd | 53.17 ± 1.54abcd | 45.77 ± 3.02de |
| 2 | 49.88 ± 1.09abcd | 51.43 ± 2.46abc | 50.23 ± 4.03abcd | 46.85 ± 3.30cde | 60.77 ± 0.91bcd | 64.07 ± 1.11abc | 64.67 ± 0.35ab | 60.83 ± 0.73bcd | 42.93 ± 2.51e | 53.13 ± 4.65abcd | 54.53 ± 3.81abc | 45.93 ± 2.03de |
| 4 | 53.45 ± 3.00ab | 54.73 ± 0.94a | 53.68 ± 0.43ab | 49.48 ± 0.95abcde | 63.43 ± 0.70abc | 64.23 ± 2.47abc | 67.70 ± 1.51a | 64.03 ± 0.56abc | 51.03 ± 1.59abcd | 57.07 ± 1.86ab | 59.00 ± 2.20a | 49.17 ± 5.36bcde |
| 8 | 52.75 ± 0.76abcd | 51.00 ± 1.10abcd | 53.03 ± 2.57abcd | 47.68 ± 2.02bcde | 63.07 ± 1.42bc | 63.60 ± 2.27abc | 61.30 ± 1.15bcd | 58.03 ± 2.20d | 48.97 ± 1.26cde | 53.40 ± 3.00abcd | 54.33 ± 2.08abc | 48.63 ± 1.98cde |
| **Plant dry biomass (g pot-1)** | | | | | | | | | | | | |
| 0 | 4.04 ± 0.09e | 6.86 ± 0.63abc | 6.88 ± 0.58abc | 6.19 ± 0.08cd | 5.45 ± 0.35h | 8.38 ± 0.63cde | 9.63 ± 0.23ab | 7.61 ± 0.33ef | 4.86 ± 0.43h | 6.56 ± 0.26fg | 7.82 ± 0.46bcde | 7.26 ± 0.40def |
| 2 | 4.64 ± 0.24e | 7.44 ± 0.35abc | 7.27 ± 0.40abc | 7.08 ± 0.97abc | 5.96 ± 0.21gh | 8.48 ± 0.19cde | 9.71 ± 0.30ab | 7.97 ± 0.08def | 5.93 ± 0.09gh | 7.63 ± 0.28cdef | 8.61 ± 0.48abc | 8.04 ± 0.73bcd |
| 4 | 5.41 ± 0.33de | 7.81 ± 1.11ab | 8.09 ± 0.09a | 7.33 ± 0.41abc | 8.03 ± 0.13def | 9.39 ± 0.66bc | 10.53 ± 0.44a | 9.38 ± 0.34bc | 6.70 ± 0.19efg | 8.71 ± 0.57abc | 9.28 ± 0.49a | 8.34 ± 0.44abcd |
| 8 | 4.64 ± 0.42e | 6.57 ± 0.25bcd | 7.66 ± 0.18ab | 6.60 ± 0.26bcd | 7.00 ± 0.16fg | 9.36 ± 0.33bc | 8.87 ± 0.20bcd | 7.78 ± 0.61ef | 6.53 ± 0.26fg | 7.93 ± 0.38bcd | 8.87 ± 0.30ab | 7.96 ± 0.49bcd |

**Supplementary Table S1.** Interaction effects of silicon-rich RHB and N sources on maize plant height and shoot biomass in soils of contrasting pH. Values represent means of three replications ± standard error. Mean values marked with same letters do not differ significantly according to the Fisher’s LSD test at p ≤ 0.05.

| **RHB  (t ha-1)** | **Acidic soil** | | | | **Neutral soil** | | | | **Alkaline soil** | | | |
| --- | --- | --- | --- | --- | --- | --- | --- | --- | --- | --- | --- | --- |
| **Without N** | **Urea** | **KNO3** | **NH4Cl** | **Without N** | **Urea** | **KNO3** | **NH4Cl** | **Without N** | **Urea** | **KNO3** | **NH4Cl** |
| **N content (%)** | | | | | | | | | | | | |
| 0 | 1.44 ± 0.01bc | 1.55 ± 0.01a | 1.55 ± 0.02a | 1.10 ± 0.01i | 1.93 ± 0.01bc | 1.88 ± 0.01d | 1.97 ± 0.01a | 1.80 ± 0.02f | 1.46 ± 0.01ef | 1.60 ± 0.02b | 1.69 ± 0.02a | 1.57 ± 0.02bc |
| 2 | 1.37 ± 0.01de | 1.48 ± 0.02b | 1.46 ± 0.02b | 1.05 ± 0.02j | 1.86 ± 0.01de | 1.79 ± 0.01fg | 1.94 ± 0.01ab | 1.72 ± 0.01h | 1.42 ± 0.01fg | 1.54 ± 0.01cd | 1.58 ± 0.01bc | 1.50 ± 0.02de |
| 4 | 1.31 ± 0.02fg | 1.40 ± 0.03cd | 1.45 ± 0.01bc | 1.00 ± 0.02j | 1.79 ± 0.01fg | 1.76 ± 0.01gh | 1.90 ± 0.01cd | 1.63 ± 0.01j | 1.39 ± 0.02gh | 1.42 ± 0.01fg | 1.43 ± 0.01fg | 1.42 ± 0.02fg |
| 8 | 1.28 ± 0.01gh | 1.25 ± 0.01h | 1.34 ± 0.01ef | 0.89 ± 0.02k | 1.66 ± 0.01ij | 1.68 ± 0.01i | 1.83 ± 0.02ef | 1.57 ± 0.01k | 1.34 ± 0.01ij | 1.35 ± 0.02hi | 1.31 ± 0.02ij | 1.29 ± 0.02j |
| **N uptake (mg pot-1)** | | | | | | | | | | | | |
| 0 | 58.25 ± 1.89c | 105.95 ± 8.97a | 106.62 ± 7.93a | 67.91 ± 1.20bc | 105.05 ± 7.26d | 173.38 ± 5.07a | 164.98 ± 11.63a | 143.27 ± 1.06b | 70.98 ± 5.99i | 113.75 ± 5.83cde | 131.93 ± 8.45abc | 105.13 ± 5.10efg |
| 2 | 63.46 ± 3.83c | 109.88 ± 4.68a | 106.42 ± 6.11a | 73.70 ± 8.79bc | 110.76 ± 3.27d | 167.60 ± 6.22a | 164.73 ± 4.64a | 142.84 ± 2.45b | 83.95 ± 0.83hi | 120.44 ± 12.12abcde | 135.91 ± 7.47a | 117.04 ± 3.74bcde |
| 4 | 70.55 ± 3.44bc | 109.63 ± 15.38a | 117.20 ± 1.89a | 73.24 ± 2.91bc | 143.86 ± 3.18b | 171.27 ± 5.64a | 178.09 ± 12.22a | 164.51 ± 5.69a | 93.44 ± 2.67fgh | 118.07 ± 5.87abcde | 132.88 ± 6.36ab | 123.77 ± 7.96abcd |
| 8 | 59.53 ± 5.10c | 82.40 ± 3.55b | 102.42 ± 2.49a | 59.23 ± 3.64c | 116.01 ± 3.39cd | 138.98 ± 2.14b | 171.11 ± 4.27a | 130.70 ±10.26bc | 87.37 ± 3.88ghi | 103.17 ± 7.61efg | 116.27 ± 4.46bcde | 107.22 ± 6.44def |

**Supplementary Table S2.** Interaction effects of silicon-rich RHB and N sources on total nitrogen content and nitrogen uptake by maize in soils of contrasting pH. Values represent means of three replications ± standard error. Mean values marked with same letters do not differ significantly according to the Fisher’s LSD test at p ≤ 0.05.

| **RHB  (t ha-1)** | **Acidic soil** | | | | **Neutral soil** | | | | **Alkaline soil** | | | |
| --- | --- | --- | --- | --- | --- | --- | --- | --- | --- | --- | --- | --- |
| **Without N** | **Urea** | **KNO3** | **NH4Cl** | **Without N** | **Urea** | **KNO3** | **NH4Cl** | **Without N** | **Urea** | **KNO3** | **NH4Cl** |
| **Si content (%)** | | | | | | | | | | | | |
| 0 | 0.83 ± 0.04i | 1.06 ± 0.01g | 1.13 ± 0.01ef | 0.84 ± 0.004i | 1.10 ± 0.07h | 1.23 ± 0.03h | 1.38 ± 0.06g | 1.22 ± 0.02h | 1.27 ± 0.04k | 1.37 ± 0.04i | 1.62 ± 0.01gh | 1.08 ± 0.02l |
| 2 | 1.33 ± 0.03c | 1.09 ± 0.01fg | 1.19 ± 0.01d | 0.90 ± 0.004h | 1.50 ± 0.02efg | 1.43 ± 0.04fg | 1.56 ± 0.01cdef | 1.44 ± 0.03fg | 1.51 ± 0.03i | 1.66 ± 0.01fg | 1.77 ± 0.005cd | 1.28 ± 0.02k |
| 4 | 1.46 ± 0.01b | 1.12 ± 0.004ef | 1.30 ± 0.01c | 1.13 ± 0.004ef | 1.59 ± 0.03bcde | 1.49 ± 0.13efg | 1.65 ± 0.03bcd | 1.54 ± 0.02def | 1.79 ± 0.01c | 1.68 ± 0.01ef | 1.80 ± 0.003c | 1.56 ± 0.01hi |
| 8 | 1.50 ± 0.01a | 1.16 ± 0.002de | 1.42 ± 0.004b | 1.18 ± 0.01d | 1.85 ± 0.03a | 1.68 ± 0.02bc | 1.71 ± 0.01b | 1.60 ± 0.01bcde | 1.86 ± 0.01b | 1.72 ± 0.01de | 2.02 ± 0.01a | 1.63 ± 0.01fg |
| **Si uptake (g pot-1)** | | | | | | | | | | | | |
| 0 | 33.68 ± 1.79g | 72.58 ± 7.37bcde | 77.27 ± 5.59bcde | 51.81 ± 0.74f | 60.08 ± 6.52i | 102.77 ± 8.93gh | 132.43 ± 2.49cdef | 92.59 ± 5.40h | 56.90 ± 5.09i | 92.93 ± 5.54gh | 126.01 ± 9.63de | 80.02 ± 6.48h |
| 2 | 61.39 ± 1.83ef | 81.34 ± 4.19bc | 86.34 ± 4.21b | 63.81 ± 8.54def | 89.18 ± 4.26h | 121.54 ± 3.96bcde | 151.33 ± 5.35bc | 114.52 ± 1.51fg | 88.93 ± 3.35gh | 123.65 ± 4.99def | 144.43 ± 2.86bcd | 102.57 ± 13.21fg |
| 4 | 78.73 ± 5.34bcd | 87.36 ± 12.60b | 104.98 ± 1.71a | 82.65 ± 4.84bc | 127.73 ± 3.95def | 139.81 ± 15.12efg | 173.26 ± 4.81a | 144.08 ± 5.28bcd | 120.30 ± 4.70ef | 151.81 ± 10.23bc | 162.20 ± 10.85ab | 126.87 ± 8.82de |
| 8 | 69.54 ± 6.83cde | 75.95 ± 2.79bcde | 109.01 ± 2.49a | 78.02 ± 3.50bcd | 129.77 ± 5.07def | 157.69 ± 7.49ab | 151.96 ± 2.94b | 124.41 ± 9.80ef | 124.86 ± 4.44de | 142.47 ± 3.55bcd | 177.19 ± 7.79a | 134.51 ± 9.68cde |

**Supplementary Table S3.** Interaction effects of silicon-rich RHB and N sources on total silicon content and silicon uptake by maize in soils of contrasting pH. Values represent means of three replications ± standard error. Mean values marked with same letters do not differ significantly according to the Fisher’s LSD test at p ≤ 0.05.
